# Supplementary material
Source: PubMed Central journal article supplement (PMC8083570)
Supplement: figure_s1_bbab102.pdf [file figure_s1_bbab102.pdf]

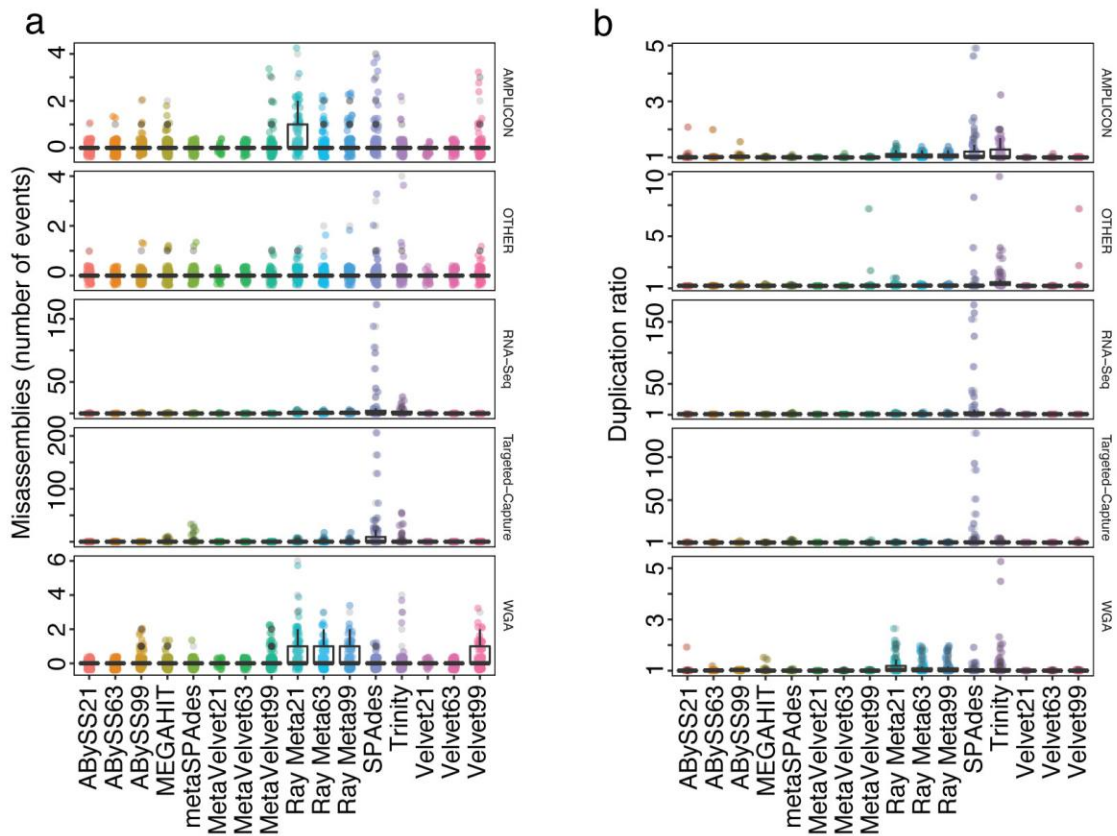

Figure S1: a) Number of events for misassemblies. b) The duplication ratios across different assays types.
