# Supplementary material
Source: PubMed Central journal article supplement (PMC8083570)
Supplement: figure_s4_bbab102.pdf [file figure_s4_bbab102.pdf]

a

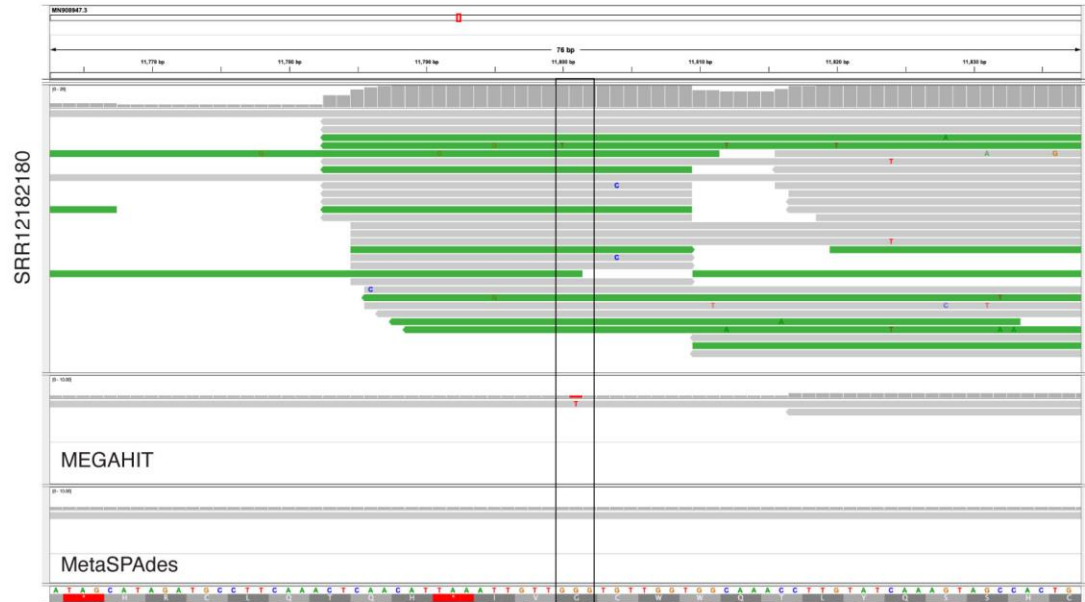

b

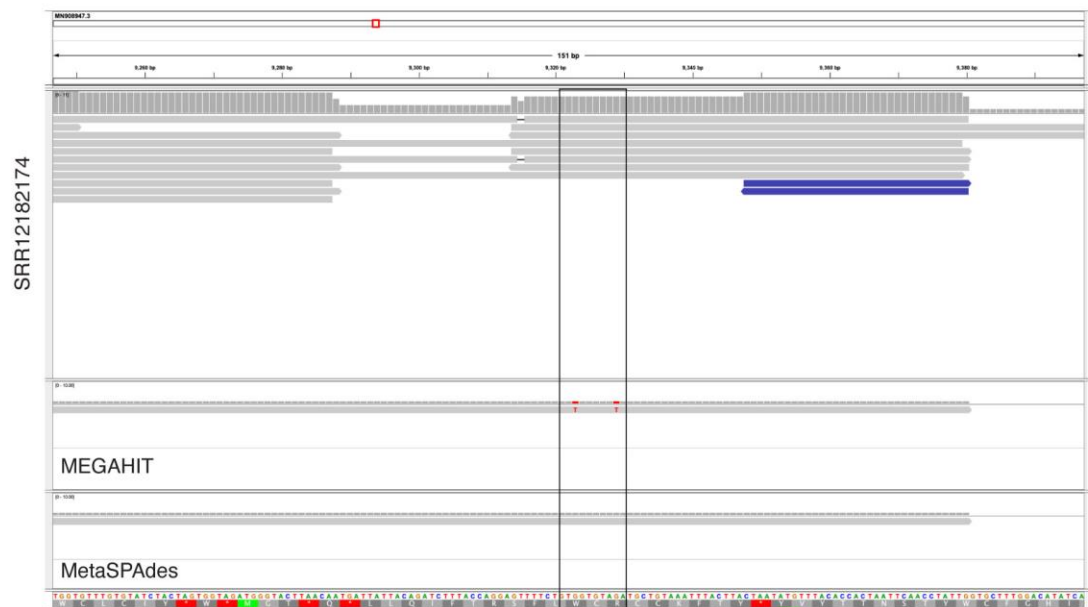

**Figure S4:** a,b) Examples of variants present in one of the assemblies by MEGAHIT and MetaSPAdes but not present in raw reads.
