# Supplementary material
Source: PubMed Central journal article supplement (PMC8083570)
Supplement: table_s1_bbab102.pdf [file table_s1_bbab102.pdf]

**Table S1.** List of software and commands used in this study

| Software   | Commands                                                                                                                                                                   | Version | Analysis | Citation |
|------------|----------------------------------------------------------------------------------------------------------------------------------------------------------------------------|---------|----------|----------|
| ABYSS      | <pre>\$abyss-pe name=\$SRA_ID k=\$kmer in=\$file1.fastq.gz \$file2.fastq.gz</pre>                                                                                          | 2.1.5   | Assembly | [1]      |
| MEGAHIT    | <pre>\$megahit -1 \$file1.fastq.gz -2 \$file2.fastq.gz -o "megahit/\${sra}" -- out-prefix "\${sra}"</pre>                                                                  | 1.2.9   | Assembly | [2]      |
| Ray Meta   | <pre>\$mpiexec -n 10 Ray -k \$kmer -p \$file1.fastq.gz \$file2.fastq.gz -o "\${sra}"</pre>                                                                                 | 2.3.1   | Assembly | [3]      |
| SPAdes     | <pre>\$spades.py -1 \$file1.fastq.gz -2 \$file2.fastq.gz -o "\${sra}"</pre>                                                                                                | 3.14.1  | Assembly | [4]      |
| metaSPAdes | <pre>\$metaspades.py -1 \$file1.fastq.gz -2 \$file2.fastq.gz -o "\${sra}"</pre>                                                                                            | 3.14.1  | Assembly | [5]      |
| Velvet     | <pre>\$velveth "velvet\${kmer}/\${sra}" \$kmer -short -separate -fastq \$file1.fastq.gz \$file2.fastq.gz  \$velvetg "velvet\${kmer}/\${sra}" -read_trkg yes</pre>          | 1.2.10  | Assembly | [6]      |
| MetaVelvet | <pre>\$velveth "metavelvet\${kmer}/\${sra}" \$kmer -short - separate -fastq \$file1.fastq.gz \$file2.fastq.gz  \$velvetg "metavelvet\${kmer}/\${sra}" -read_trkg yes</pre> | 1.2.01  | Assembly | [7]      |

|           |                                                                                                                                                                         |        |                          |      |
|-----------|-------------------------------------------------------------------------------------------------------------------------------------------------------------------------|--------|--------------------------|------|
|           | <pre>\$meta-velvetg "metavelvet\${kmer}/\${s ra}"</pre>                                                                                                                 |        |                          |      |
| Trinity   | <pre>\$Trinity --seqType fq --max_memory 10G -- left \$file1.fastq.gz --right \$file2.fastq.gz -- no_bowtie</pre>                                                       | 2.11.0 | Assembly                 | [8]  |
| MetaQUAST | <pre>\$metaquast.py *contig.fasta -o \$Output_Directory -r MN908947.3.fasta -- fast --silent</pre>                                                                      |        |                          | [9]  |
| BWA       | <pre>\$bwa mem MN908947.3.fasta \$file1.fastq.gz \$file2.fastq.gz &gt;out.sam</pre>                                                                                     |        | Alignment of short reads | [10] |
| Minimap2  | <pre>\$minimap2 -ax asm5 MN908947.3.fasta \$input.fasta &gt;out.sam</pre>                                                                                               |        | Alignment of contigs     | [11] |
| Picard    | <pre>\$java -jar picard.jar MarkDuplicates I=\$file.sorted.bam O=\$file.dupsMarked.bam M=\$file.marked_dup_met rics.txt</pre>                                           |        | Duplicate read marking   | [12] |
| Bedtools  | <pre>\$bedtools intersect -a \$file1.bed -b \$file2.bed  \$bedtools makewindows -g MN908947.3.sizes.txt - w 50  \$bedtools bamtobed -i \$file.bam &gt; \$file.bed</pre> |        | Analysis of bed file     | [13] |
| Samtools  | <pre>\$samtools sort \$file.bam -o \$file.sorted.bam  \$samtools index \$file.bam</pre>                                                                                 |        | Analysis of sam/bam file | [14] |

|             |                                                                                                                                                                   |       |                              |      |
|-------------|-------------------------------------------------------------------------------------------------------------------------------------------------------------------|-------|------------------------------|------|
| bcftools    | <pre>\$bcftools mpileup -f MN908947.3.fasta \$file.sorted.bam &gt; \$file.raw.vcf  \$bcftools call -c -v - -ploidy 1 -O v -o \$file.call.vcf \$file.raw.vcf</pre> |       | Variant calling              | [14] |
| SRA Toolkit | <pre>\$fastq-dump --split- files --outdir \$Output_Directory -- gzip \$SRA_ID</pre>                                                                               |       | Download SRA files           | [15] |
| R           |                                                                                                                                                                   | 3.5.2 | Visualization and statistics | [16] |

### References:

1. Simpson JT, Wong K, Jackman SD, et al. ABySS: A parallel assembler for short read sequence data. *Genome Res.* 2009; 19:1117–1123
2. Li D, Liu C-M, Luo R, et al. MEGAHIT: an ultra-fast single-node solution for large and complex metagenomics assembly via succinct de Bruijn graph. *Bioinformatics* 2015; 31:1674–1676
3. Boisvert S, Raymond F, Godzaridis É, et al. Ray Meta: Scalable de novo metagenome assembly and profiling. *Genome Biol.* 2012; 13:R122
4. Bankevich A, Nurk S, Antipov D, et al. SPAdes: A new genome assembly algorithm and its applications to single-cell sequencing. *J. Comput. Biol.* 2012; 19:455–477
5. Nurk S, Meleshko D, Korobeynikov A, et al. MetaSPAdes: A new versatile metagenomic assembler. *Genome Res.* 2017; 27:824–834

6. Zerbino DR, Birney E. Velvet: Algorithms for de novo short read assembly using de Bruijn graphs. *Genome Res.* 2008; 18:821–829
7. Namiki T, Hachiya T, Tanaka H, et al. MetaVelvet: An extension of Velvet assembler to de novo metagenome assembly from short sequence reads. *Nucleic Acids Res.* 2012; 40:
8. Grabherr MG, Haas BJ, Yassour M, et al. Full-length transcriptome assembly from RNA-Seq data without a reference genome. *Nat. Biotechnol.* 2011; 29:644–652
9. Mikheenko A, Saveliev V, Gurevich A. MetaQUAST: Evaluation of metagenome assemblies. *Bioinformatics* 2016; 32:1088–1090
10. Li H. Aligning sequence reads, clone sequences and assembly contigs with BWA-MEM. 2013;
11. Li H. Minimap2: Pairwise alignment for nucleotide sequences. *Bioinformatics* 2018; 34:3094–3100
12. Broad Institute. Picard Tools - By Broad Institute. Github 2009;
13. Quinlan AR, Hall IM. BEDTools: A flexible suite of utilities for comparing genomic features. *Bioinformatics* 2010; 26:841–842
14. Li H, Handsaker B, Wysoker A, et al. The Sequence Alignment/Map format and SAMtools. *Bioinformatics* 2009; 25:2078–2079
15. SRA Toolkit Development Team. SRA-Tools - NCBI. 2020;
16. Team R core. R: A language and environment for statistical computing. 2020;
