# Supplementary material
Source: PubMed Central journal article supplement (PMC8083570)
Supplement: table_s2_bbab102.pdf [file table_s2_bbab102.pdf]

**Table S2.** Terminologies used to assess the quality of the genome [1].

| <b>Matrices</b>        | <b>Definition</b>                                                                                                                                                 |
|------------------------|-------------------------------------------------------------------------------------------------------------------------------------------------------------------|
| Genome fraction (%)    | The ratio of total aligned bases to the reference genome                                                                                                          |
| Largest contig         | The length of the largest contig in the assembly                                                                                                                  |
| Nx (N50/N75)           | Shortest contig length needed to cover x% of the genome                                                                                                           |
| NAx (NA50/NA75)        | Shortest aligned blocks needed to cover x% of the genome. Aligned blocks are obtained by breaking contigs in misassembly events and removing all unaligned bases. |
| Lx (L50/L75)           | The minimum number of contigs that make up x% of genome size                                                                                                      |
| LAx (LA50/LA75)        | The minimum number of aligned contigs that make up x% of genome                                                                                                   |
| Total length           | The total number of bases in the assembly                                                                                                                         |
| Largest alignment      | The largest uninterrupted alignment in the assembly                                                                                                               |
| Mismatches per 100 kbp | The average number of mismatches per 10 kbp aligned bases                                                                                                         |
| Contigs >= 1000 bp     | The number of contigs that are >= 1 kb                                                                                                                            |
| Number of Contigs      | The total number of contigs in the assembly                                                                                                                       |
| Indels per 100 kbp     | The average number of single nucleotide insertions or deletions per 100 kbp aligned bases                                                                         |
| Total aligned length   | The total aligned bases of in the assembly                                                                                                                        |
| Misassemblies          | The number of misassembly events                                                                                                                                  |

## References

1. Gurevich A, Saveliev V, Vyahhi N, Tesler G. QCAST: quality assessment tool for genome assemblies. *Bioinformatics*. 2013;29:1072–5.
