# Supplementary material
Source: PubMed Central journal article supplement (PMC8083570)

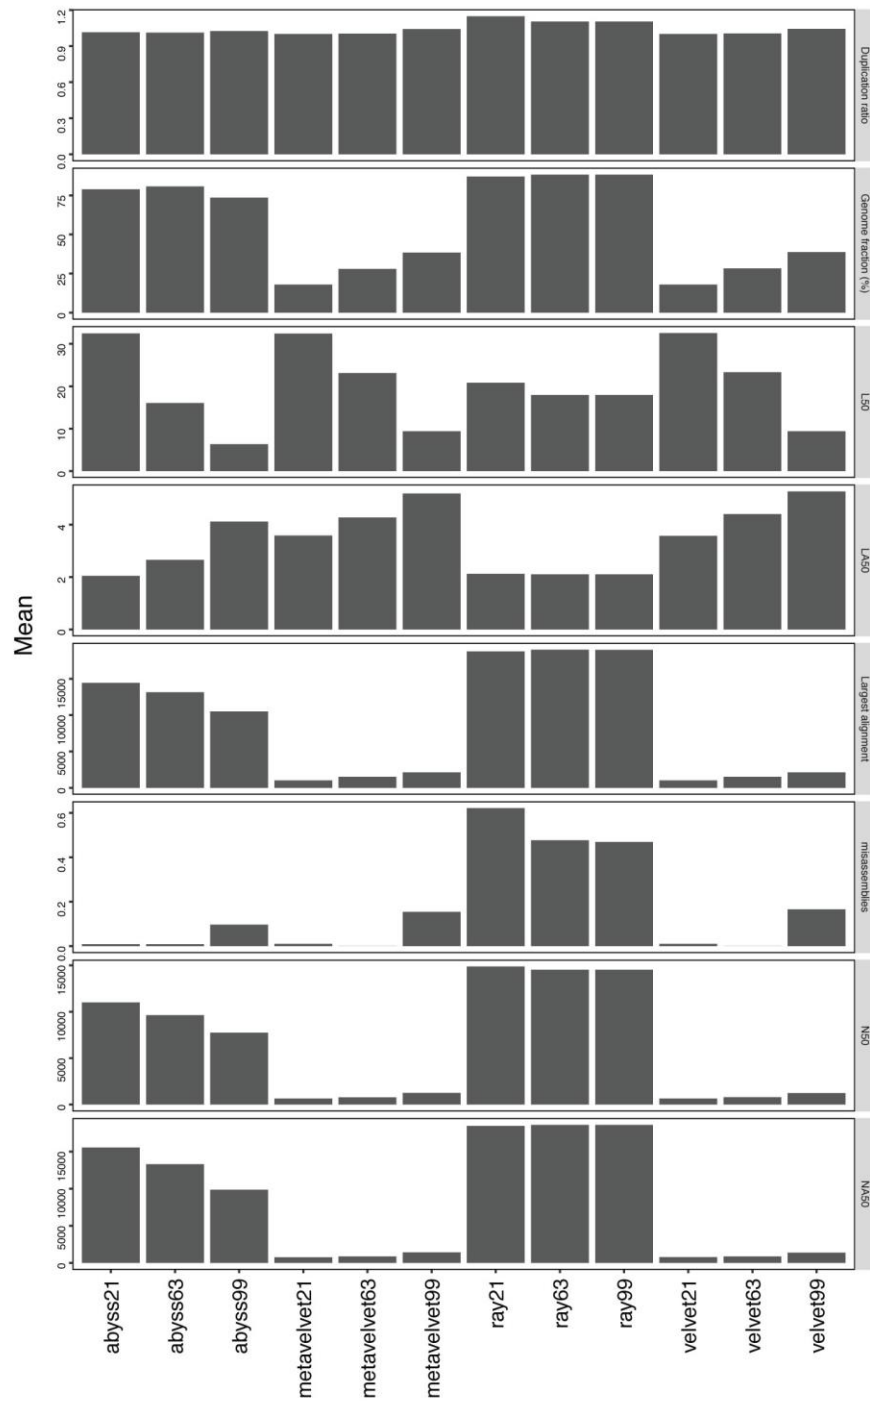

Figure S2: Assembly quality at different k-mers.

Supplement: figure_s2_bbab102.pdf [file figure_s2_bbab102.pdf]

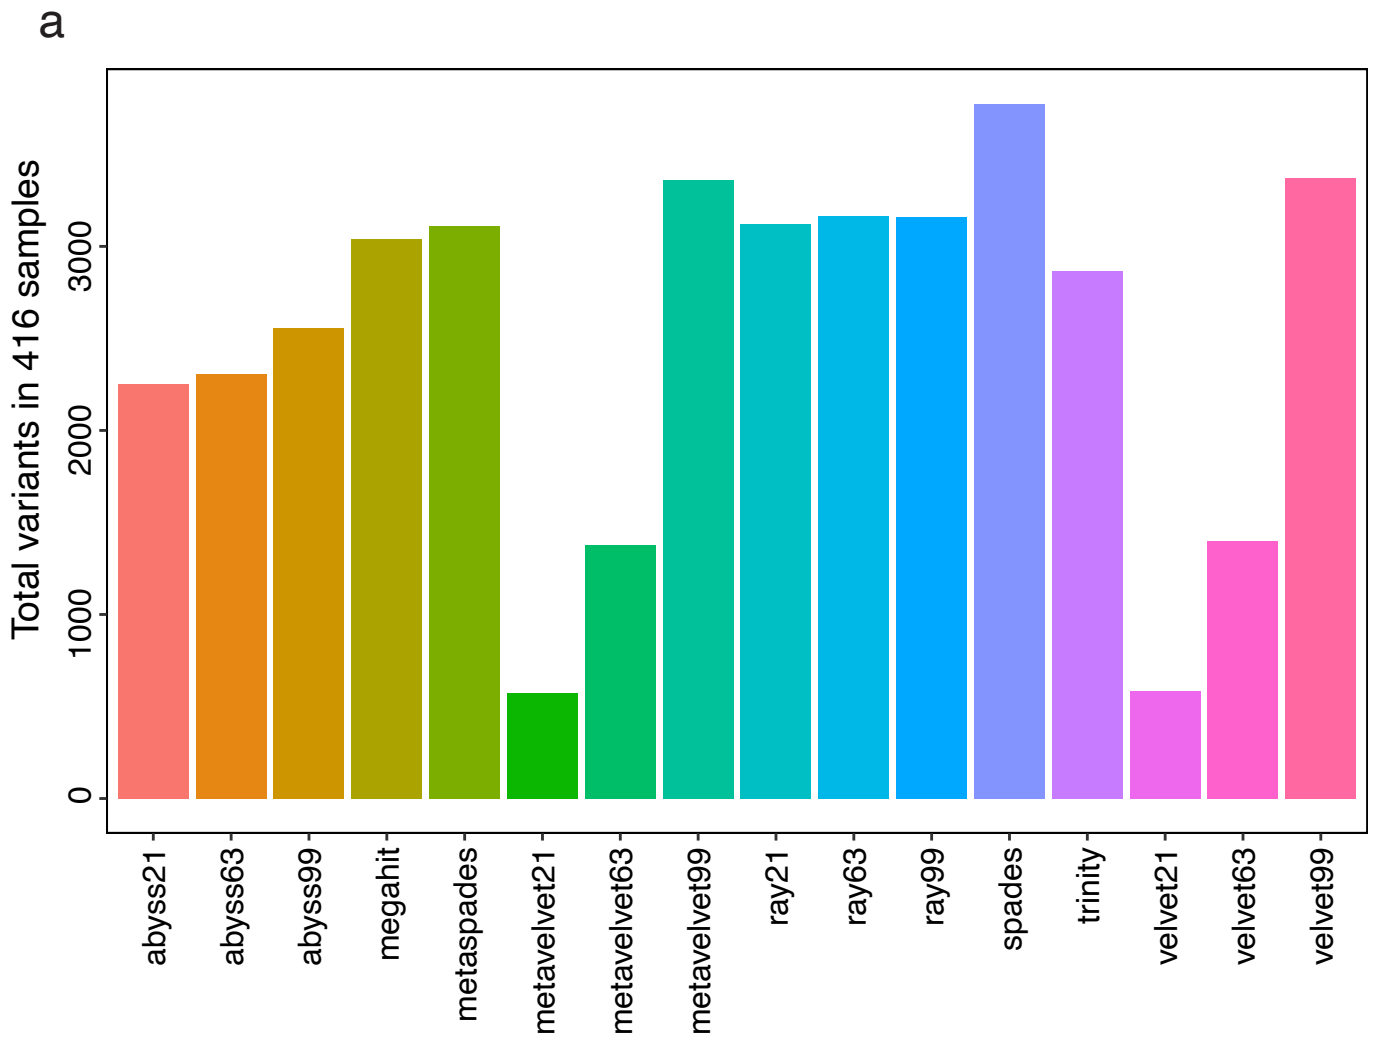

Figure S3: a) Variant counts per assembler.

Supplement: figure_s3_bbab102.pdf [file figure_s3_bbab102.pdf]
